# Supplementary material for: Convergent evolution involving dimeric and trimeric dUTPases in pathogenicity island mobilization
Source: PLOS journal article supplement (doi:10.1371/journal.ppat.1006581), 2017-09-11
Supplement: S9 (10.1371/journal.ppat.1006581.s009) [file journal.ppat.1006581.s009]

**Supplementary Table 2. Differences in catalytic motifs between trimeric and dimeric Duts.**

|               | Catalytic motifs <sup>a</sup> |         |           |              |                |
|---------------|-------------------------------|---------|-----------|--------------|----------------|
|               | I                             | II      | III       | IV           | V              |
| Dimeric Duts  | QIQKEF <sup>b</sup>           | VVEFFWF | ETFKNWK   | ELADM LAFGLS | DAYKKMKRNHERQD |
| Trimeric Duts | AGYDIFSA                      | RSGVS   | GKIDAGYHG | GDKLAQ       | RGEKGFGSSG     |

<sup>a</sup>Consensus sequence in catalytic motifs in Duts from *S. aureus* phages

<sup>b</sup>Residues in black and grey are completely or partially conserved in all the sequences analyzed
